# Supplementary material
Source: PubMed Central journal article supplement (PMC7230015)

## Age effects on DNIC

Resting state 2

Old > Young  $p < 0.05$

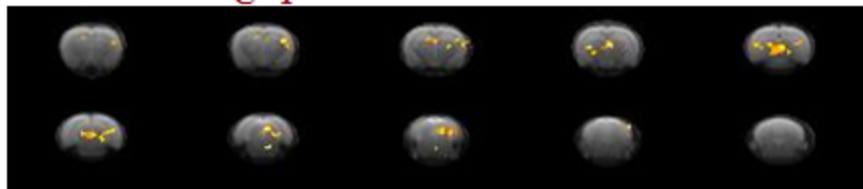

Resting state 2

Young > Old  $p < 0.05$

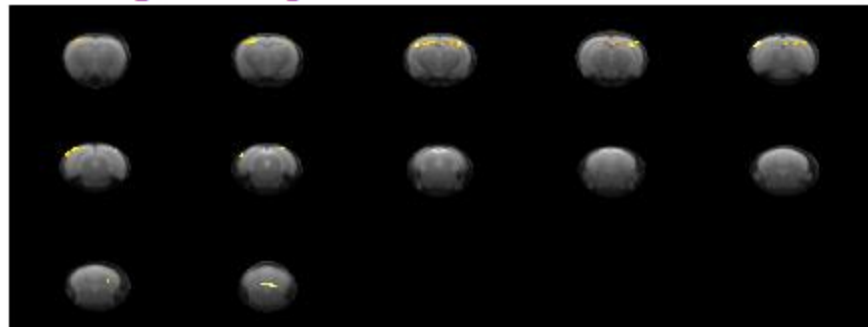

Resting state 3

Old > Young  $p < 0.05$

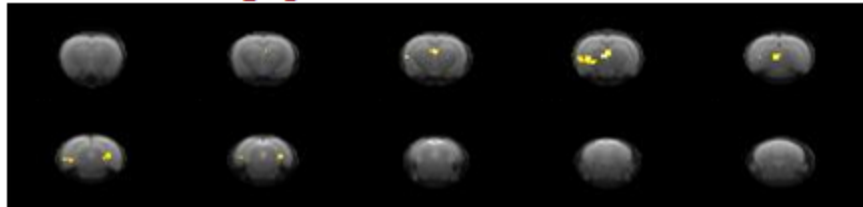

Supplement: NIHMS1549969-supplement-Supplementary_Materials_S2.pdf [file NIHMS1549969-supplement-Supplementary_Materials_S2.pdf]

## Sex effects on DNIC

Resting state 2

Female > Male  $p < 0.05$

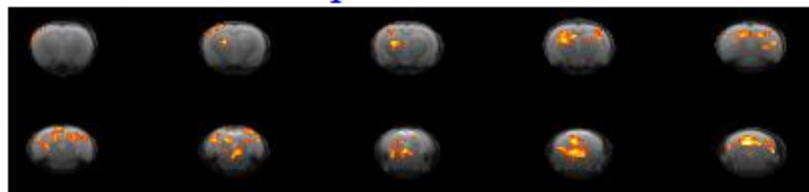

$p < 0.01$

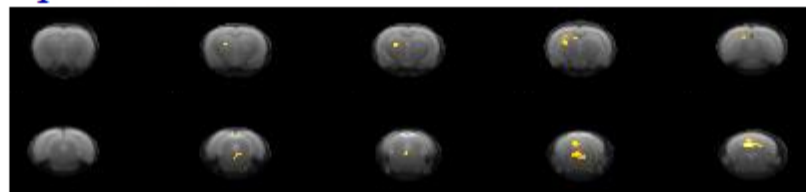

$p < 0.005$

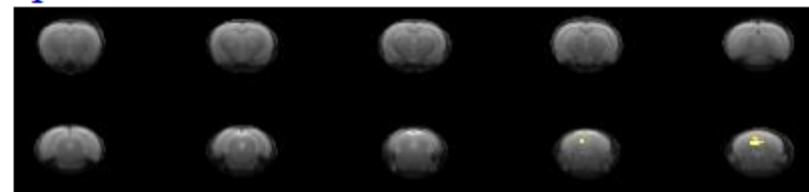

Resting state 3

Female > Male  $p < 0.05$

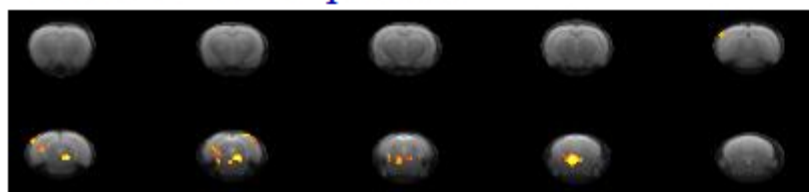

$p < 0.01$

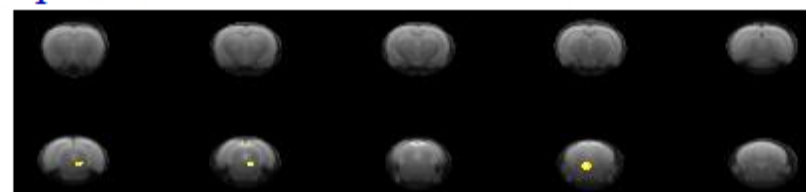

Supplement: NIHMS1549969-supplement-Supplementary_Materials__S3.pdf [file NIHMS1549969-supplement-Supplementary_Materials__S3.pdf]

# Sex effects on DNIC

Resting state 2

Male > Female  $p < 0.05$

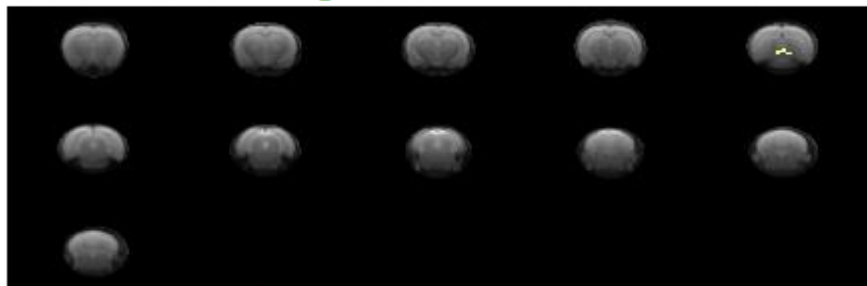

Resting state 3

Male > Female  $p < 0.05$

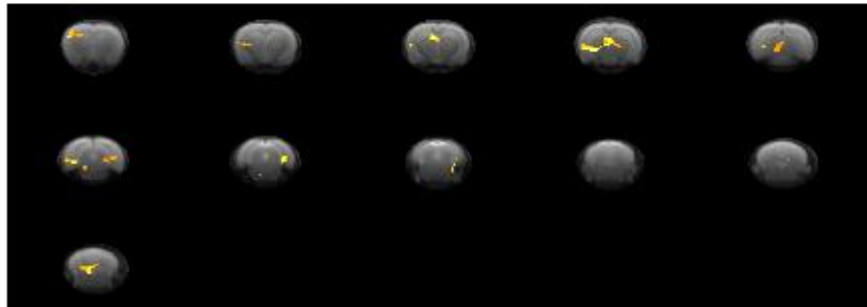

Supplement: NIHMS1549969-supplement-Supplementary_Materials__S4.pdf [file NIHMS1549969-supplement-Supplementary_Materials__S4.pdf]
